# Supplementary material
Source: PubMed Central journal article supplement (PMC6357804)
Supplement: kwy239_kahn_web_material_final.pdf [file kwy239_kahn_web_material_final.pdf]

## WEB MATERIAL

### **Analyzing Vaccine Trials in Epidemics With Mild and Asymptomatic Infection**

Rebecca Kahn\*, Matt Hitchings, Rui Wang, Steven Bellan, and Marc Lipsitch

\*Correspondence to Rebecca Kahn, Harvard T.H. Chan School of Public Health, Department of Epidemiology, 677 Huntington Avenue, Suite 506, Boston, MA 02115 (e-mail: rek160@mail.harvard.edu).

#### Table of Contents

Web Table 1. Model parameters

Web Table 2. Median number of events

Web Table 3. Median variance

Web Table 4. Median  $VE_P$  estimate in full trial and sample from approach 7 when  $VE_P \neq 0$

Web Table 5.  $VE_S$  estimates (empirical coverage probabilities)

Web Figure 1.  $VE_S$  estimates (200-day trial)

Web Figure 2.  $VE_S$  estimates (Ebola-like parameters and higher  $R_0$ )

Web Figure 3.  $VE_S$  estimates (varying baseline parameters)

References

**Web Table 1.** Model parameters

| <b>Parameter</b>         | <b>Meaning</b>                                                                                                                                                                                                                                                                             | <b>Value/range</b>                                                    |
|--------------------------|--------------------------------------------------------------------------------------------------------------------------------------------------------------------------------------------------------------------------------------------------------------------------------------------|-----------------------------------------------------------------------|
| $R_0$                    | Average number of secondary infections generated by an infected individual within the communities; function of force of infection ( $\beta$ ), infectious period, and network structure (7, 8)                                                                                             | Baseline: 1.0, 1.25, 1.5<br>Supplement: 2.5, 5.0                      |
| Latent period            | Latent period length (days)                                                                                                                                                                                                                                                                | Baseline: 6.0 (1)<br>Supplement (Ebola-like): 9.7 (2, 3)              |
| Infectious period        | Mean infectious period length (days); gamma-distributed with rate = 1.13 and shape = 0.188                                                                                                                                                                                                 | Baseline: 6.0 (4)<br>Supplement (Ebola-like): 5 (2, 3)                |
| VE                       | Individual vaccine efficacy                                                                                                                                                                                                                                                                | Baseline: 0.6<br>Supplement: 0.4, 0.8                                 |
| $N_i$                    | Size of community $i$                                                                                                                                                                                                                                                                      | 20,000, 4,000, 3,500                                                  |
| Number of communities    | Number of communities in the network                                                                                                                                                                                                                                                       | 1, 5                                                                  |
| Symptomatic (vaccinated) | The proportion of infected individuals in the vaccinated group who become symptomatic                                                                                                                                                                                                      | Baseline: 0.2<br>Supplement: 0.1, 0.3<br>Supplement (Ebola-like): 0.9 |
| Symptomatic (control)    | The proportion of infected individuals in the control group who become symptomatic                                                                                                                                                                                                         | Baseline: 0.2<br>Supplement (Ebola-like): 0.9                         |
| $a$                      | Constant in calculation of importation rate into communities from main population <ul style="list-style-type: none"> <li><math>M_i = a \times \sqrt{N_i}</math>, where <math>M_i</math> is importation rate and <math>N_i</math> is the size of community <math>I</math> (5, 8)</li> </ul> | 40                                                                    |
| Within degree            | Average within-community degree (i.e. the average number of contacts each person has within their own community)                                                                                                                                                                           | 30–52                                                                 |

|                 |                                                                                                                               |                                  |
|-----------------|-------------------------------------------------------------------------------------------------------------------------------|----------------------------------|
| Between degree  | Average between-community degree (i.e., the average number of contacts each person has outside of their own community)        | 0–5                              |
| Trial size      | Average number of individuals enrolled                                                                                        | 1,500                            |
| Trial start day | First day of enrollment, vaccination and start of follow-up, relative to the first day of the epidemic in the main population | 100                              |
| Trial length    | Length of follow-up after trial start (days)                                                                                  | Baseline: 150<br>Supplement: 200 |
| % enrolled      | % of each community enrolled into the trial                                                                                   | 7.5%, 3%                         |

**Web Table 2.** Median number of events

| <b>Group</b> | <b><math>R_0 = 1.00</math></b> |                          | <b><math>R_0 = 1.25</math></b> |                          | <b><math>R_0 = 1.50</math></b> |                          |
|--------------|--------------------------------|--------------------------|--------------------------------|--------------------------|--------------------------------|--------------------------|
|              | <b>1<br/>Community</b>         | <b>5<br/>Communities</b> | <b>1<br/>Community</b>         | <b>5<br/>Communities</b> | <b>1<br/>Community</b>         | <b>5<br/>Communities</b> |
| Vaccinated   | 34                             | 33                       | 173                            | 171                      | 309                            | 306                      |
| Control      | 82                             | 81                       | 361                            | 353                      | 543                            | 544                      |

**Web Table 3.** Median variance

| Approach |                                           | $R_0 = 1.00$   |                   | $R_0 = 1.25$   |                   | $R_0 = 1.50$   |                   |
|----------|-------------------------------------------|----------------|-------------------|----------------|-------------------|----------------|-------------------|
|          |                                           | 1<br>Community | 5<br>Communities* | 1<br>Community | 5<br>Communities* | 1<br>Community | 5<br>Communities* |
| 1        | Cox “perfect knowledge”                   | 0.042          | 0.043, 0.040      | 0.009          | 0.009, 0.009      | 0.005          | 0.005, 0.005      |
| 2        | Cox—symptomatic only                      | 0.217          | 0.228, 0.210      | 0.044          | 0.044, 0.044      | 0.026          | 0.026, 0.026      |
| 3        | Relative risk estimate                    | 0.039          | 0.040, 0.039      | 0.006          | 0.006, 0.006      | 0.002          | 0.002, 0.002      |
| 4        | Corrected relative risk estimate (6)      | 0.007          | 0.007, 0.006      | 0.001          | 0.001, 0.001      | 0.001          | 0.001, 0.001      |
| 5        | Interval-censored Cox model (3 intervals) | 0.042          | 0.044, 0.044      | 0.009          | 0.009, 0.009      | 0.005          | 0.005, 0.005      |
| 6        | Interval-censored Cox model (1 interval)  | 0.043          | 0.278, 0.044      | 0.009          | 0.046, 0.009      | 0.005          | 0.028, 0.005      |
| 7        | Imputation                                | 0.059          | 0.046, 0.21       | 0.01           | 0.009, 0.01       | 0.006          | 0.006, 0.007      |

\* First number is from the analysis of the five communities as one large community and the second is from the stratified and meta-analyzed analyses.

**Web Table 4.** Median  $VE_P$  estimate in full trial and sample from approach 7 when  $VE_P \neq 0$

| <b>True<br/><math>VE_P</math></b> | <b><math>R_0 = 1.00</math></b> |               | <b><math>R_0 = 1.25</math></b> |               | <b><math>R_0 = 1.50</math></b> |               |
|-----------------------------------|--------------------------------|---------------|--------------------------------|---------------|--------------------------------|---------------|
|                                   | <b>Full Trial</b>              | <b>Sample</b> | <b>Full Trial</b>              | <b>Sample</b> | <b>Full Trial</b>              | <b>Sample</b> |
| 0.50                              | 0.49                           | 1             | 0.51                           | 0.56          | 0.50                           | 0.49          |
| -0.50                             | -0.49                          | -0.17         | -0.51                          | -0.53         | -0.59                          | -0.49         |

**Web Table 5.**  $VE_S$  estimates (empirical coverage probabilities)<sup>a</sup>

| Approach | $R_0 = 1.00$                    |                                  | $R_0 = 1.25$                    |                                  | $R_0 = 1.50$                    |                                  |
|----------|---------------------------------|----------------------------------|---------------------------------|----------------------------------|---------------------------------|----------------------------------|
|          | 200-Day Trial                   |                                  | 200-Day Trial                   |                                  | 200-Day Trial                   |                                  |
| 1        | 0.59 (0.97)                     |                                  | 0.59 (0.93)                     |                                  | 0.59 (0.95)                     |                                  |
| 2        | 0.58 (0.95)                     |                                  | 0.51 (0.76)                     |                                  | 0.46 (0.53)                     |                                  |
| 3        | 0.57 (0.96)                     |                                  | 0.49 (0.13)                     |                                  | 0.43 (0)                        |                                  |
| 4        | 0.6 (0.96)                      |                                  | 0.59 (0.95)                     |                                  | 0.6 (0.95)                      |                                  |
| 5        | 0.59 (0.96)                     |                                  | 0.59 (0.92)                     |                                  | 0.6 (0.95)                      |                                  |
| 6        | 0.59 (0.96)                     |                                  | 0.60 (0.93)                     |                                  | 0.6 (0.95)                      |                                  |
| 7        | 0.60 (0.90)                     |                                  | 0.60 (0.92)                     |                                  | 0.60 (0.92)                     |                                  |
|          | <b><math>VE_P = 0.50</math></b> | <b><math>VE_P = -0.50</math></b> | <b><math>VE_P = 0.50</math></b> | <b><math>VE_P = -0.50</math></b> | <b><math>VE_P = 0.50</math></b> | <b><math>VE_P = -0.50</math></b> |
| 1        | 0.59 (0.94)                     | 0.59 (0.93)                      | 0.59 (0.96)                     | 0.59 (0.94)                      | 0.59 (0.93)                     | 0.59 (0.94)                      |
| 2        | 0.79 (0.87)                     | 0.37 (0.79)                      | 0.77 (0.46)                     | 0.27 (0.11)                      | 0.73 (0.49)                     | 0.17 (0)                         |
| 3        | 0.58 (0.95)                     | 0.58 (0.95)                      | 0.51 (0.48)                     | 0.51 (0.43)                      | 0.43 (0)                        | 0.43 (0)                         |
| 4        | 0.59 (0.96)                     | 0.59 (0.96)                      | 0.59 (0.97)                     | 0.59 (0.94)                      | 0.59 (0.93)                     | 0.59 (0.95)                      |
| 5        | 0.59 (0.94)                     | 0.59 (0.94)                      | 0.59 (0.95)                     | 0.59 (0.93)                      | 0.59 (0.92)                     | 0.59 (0.94)                      |
| 6        | 0.59 (0.94)                     | 0.59 (0.92)                      | 0.59 (0.94)                     | 0.59 (0.93)                      | 0.59 (0.93)                     | 0.59 (0.94)                      |
| 7        | 0.58 (0.88)                     | 0.57 (0.90)                      | 0.60 (0.90)                     | 0.60 (0.92)                      | 0.61 (0.92)                     | 0.59 (0.92)                      |
|          | <b><math>VE_S = 0.40</math></b> | <b><math>VE_S = 0.80</math></b>  | <b><math>VE_S = 0.80</math></b> | <b><math>VE_S = 0.80</math></b>  | <b><math>VE_S = 0.80</math></b> | <b><math>VE_S = 0.80</math></b>  |
| 1        | 0.4 (0.95)                      | 0.8 (0.94)                       | 0.39 (0.95)                     | 0.8 (0.94)                       | 0.39 (0.94)                     | 0.79 (0.92)                      |
| 2        | 0.42 (0.95)                     | 0.78 (0.9)                       | 0.33 (0.91)                     | 0.75 (0.84)                      | 0.26 (0.71)                     | 0.7 (0.46)                       |
| 3        | 0.38 (0.77)                     | 0.79 (1)                         | 0.32 (0.24)                     | 0.74 (0.99)                      | 0.24 (0)                        | 0.68 (0.25)                      |
| 4        | 0.4 (0.94)                      | 0.8 (0.95)                       | 0.4 (0.93)                      | 0.8 (0.95)                       | 0.39 (0.95)                     | 0.79 (0.93)                      |
| 5        | 0.4 (0.94)                      | 0.8 (0.95)                       | 0.4 (0.95)                      | 0.8 (0.94)                       | 0.39 (0.93)                     | 0.79 (0.91)                      |
| 6        | 0.4 (0.95)                      | 0.8 (0.95)                       | 0.4 (0.94)                      | 0.8 (0.94)                       | 0.39 (0.93)                     | 0.79 (0.92)                      |
| 7        | 0.37 (0.82)                     | 0.77 (0.96)                      | 0.40 (0.81)                     | 0.8 (0.98)                       | 0.40 (0.80)                     | 0.8 (1)                          |
|          | <b>Ebola-Like Parameters</b>    |                                  | <b><math>R_0 = 2.50</math></b>  |                                  | <b><math>R_0 = 5.00</math></b>  |                                  |
| 1        | 0.59 (0.94)                     |                                  | 0.59 (0.92)                     |                                  | 0.58 (0.88)                     |                                  |
| 2        | 0.57 (0.85)                     |                                  | 0.3 (0.02)                      |                                  | 0.13 (0.04)                     |                                  |
| 3        | 0.45 (0)                        |                                  | 0.27 (0)                        |                                  | 0.09 (0.01)                     |                                  |
| 4        | 0.59 (0.96)                     |                                  | 0.59 (0.94)                     |                                  | 0.59 (0.97)                     |                                  |
| 5        | 0.59 (0.94)                     |                                  | 0.59 (0.91)                     |                                  | 0.59 (0.91)                     |                                  |
| 6        | 0.59 (0.94)                     |                                  | 0.59 (0.92)                     |                                  | 0.58 (0.92)                     |                                  |
| 7        | 0.59 (0.98)                     |                                  | 0.64 (0.92)                     |                                  | 0.73 (0.98)                     |                                  |

<sup>a</sup> Empirical coverage probabilities are calculated by the proportion of simulations with 95% confidence intervals that cover the true  $VE_S$  parameter of the model.

Web Figure 1.

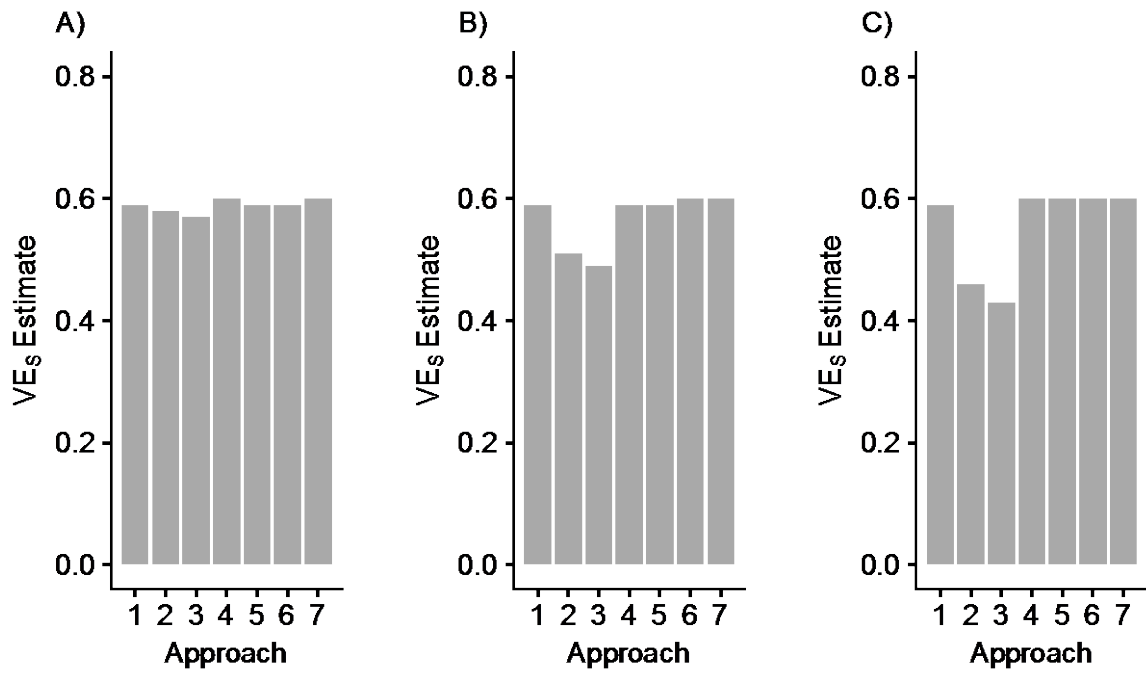

VE<sub>S</sub> estimates (200-day trial). The estimates for vaccine efficacy against susceptibility to infection (VE<sub>S</sub>) using seven different approaches for A)  $R_0 = 1$ , B)  $R_0 = 1.25$ , and C)  $R_0 = 1.5$  for a 200-day long trial. The seven approaches are: Cox “perfect knowledge” (1), Cox—symptomatic only (2), relative risk estimate (3), corrected relative risk estimate (4), interval-censored Cox model (3 intervals) (5), interval-censored Cox model (1 interval) (6), and imputation (7).



Web Figure 2.

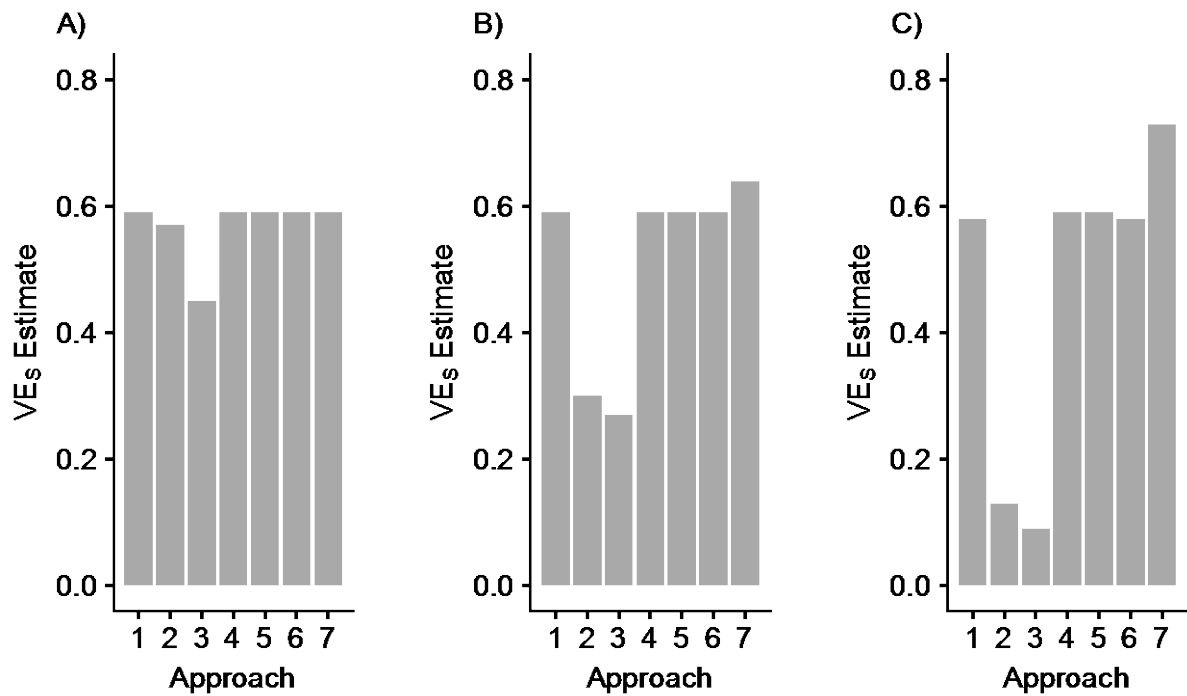

VE<sub>s</sub> estimates (Ebola-like parameters and higher  $R_0$ ). The estimates for vaccine efficacy against susceptibility to infection (VE<sub>s</sub>) using seven different approaches, from simulations with A) Ebola-like parameters, B) the baseline parameters with  $R_0 = 2.5$ , and C) the baseline parameters with  $R_0 = 5$ . The seven approaches are: Cox “perfect knowledge” (1), Cox—symptomatic only (2), relative risk estimate (3), corrected relative risk estimate (4), interval-censored Cox model (3 intervals) (5), interval-censored Cox model (1 interval) (6), and imputation (7).

Web Figure 3.

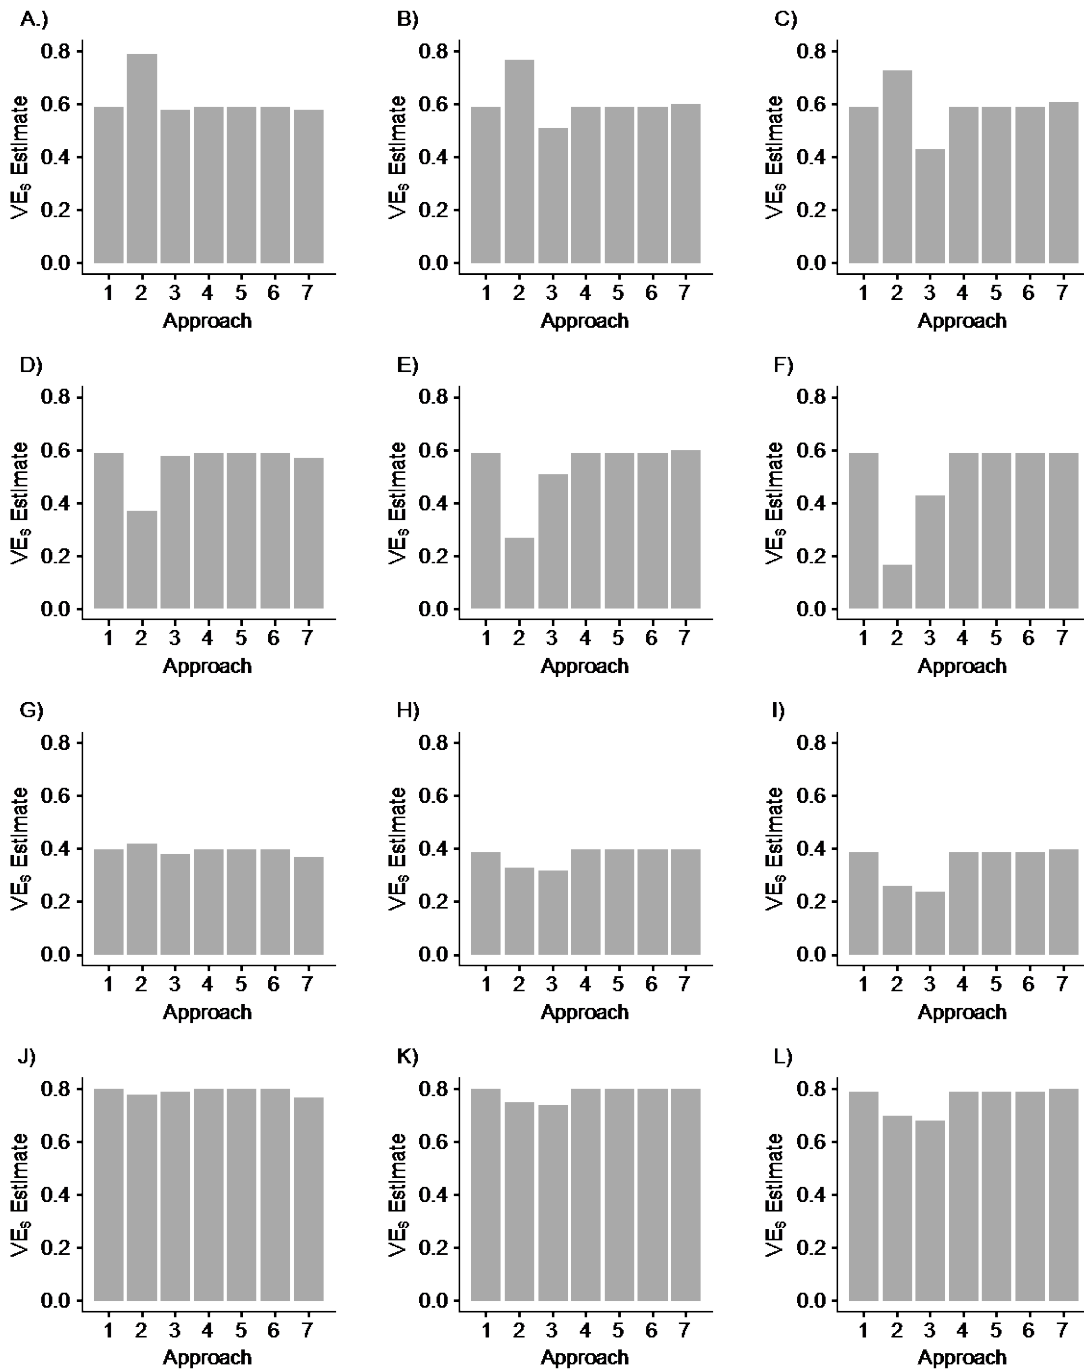

Varying baseline parameters. The estimates for vaccine efficacy against susceptibility to infection ( $VE_S$ ) using seven different methods when A)  $R_0 = 1$ , B)  $R_0 = 1.25$ , and C)  $R_0 = 1.5$  and  $VE_P = 0.50$ , when D)  $R_0 = 1$ , E)  $R_0 = 1.25$ , and F)  $R_0 = 1$  and  $VE_P = -0.50$ , when G)  $R_0 = 1$ , H)  $R_0 = 1.25$ , and I)  $R_0 = 1.5$  and input  $VE_S = 0.40$ , and when J)  $R_0 = 1$ , K)  $R_0 = 1.25$ , and L)  $R_0 = 1.5$  and input  $VE_S = 0.80$ .

## References

1. Krow-Lucal ER, Biggerstaff BJ, Staples JE. Estimated incubation period for zika virus disease. *Emerg. Infect. Dis.* 2017;23(5):841–844.
2. WHO Ebola Response Team. West African Ebola Epidemic after One Year — Slowing but Not Yet under Control. *N. Engl. J. Med.* 2014;372(6):584–587. (<http://dx.doi.org/10.1056/NEJMc1414992>)
3. Hitchings MDT, Lipsitch M, Wang R, et al. Competing Effects Of Indirect Protection And Clustering On The Power Of Cluster-Randomized Controlled Vaccine Trials. *Am. J. Epidemiol.* 2018;
4. Centers for Disease Control and Prevention. *Zika Virus.* 2017. <https://www.cdc.gov/zika/prevention/transmission-methods.html>. Accessed October 9, 2018.
5. Keeling MJ, Rohani P. Modeling Infectious Diseases in Humans and Animals. 2008 864-865 p.(<http://cid.oxfordjournals.org/lookup/doi/10.1086/591197>)
6. Haber M, Longini IM, Halloran ME. Estimation of vaccine efficacy in outbreaks of acute infectious diseases. *Stat. Med.* 1991;10(10):1573–1584.
7. Meyers LA, Pourbohloul B, Newman MEJ, et al. Network theory and SARS: Predicting outbreak diversity. *J. Theor. Biol.* 2005;232(1):71–81.
8. Kahn R, Hitchings M, Bellan S, et al. Impact of stochastically generated heterogeneity in hazard rates on individually randomized vaccine efficacy trials. *Clin. Trials.* 2018;15(2):207–211.
